# Supplementary material
Source: publisher site journal article supplement (https://www.dovepress.com/article/295742)
Supplement: Supplementary file 1 [file get_supplementary_file.php]

**Supplementary Materials**

**Table S1.** Comparison of the absolute spectral power densitiesa of the groups during total sleep after adjusting for cortical responses of respiratory events and potential confounding factors

| *Spectral bands* | *Non-OSA (n=1381)* | *Mild OSA (n=1599)* | *Mod. OSA (n=951)* | *Sev. OSA (n=562)* | *ANOVA* | *ANCOVA*b | |
| --- | --- | --- | --- | --- | --- | --- | --- |
| *Statistics* | *Statistics* | *Significant difference after post hoc analysisc* |
| Delta  (1-4 Hz) | 1.476 ±0.188 | 1.437 ±0.187 | 1.405 ±0.184 | 1.384 ±0.194 | *F*=34.94, *p*<0.001,  ***p corr*<0.001** | *F*=1.15,  *p*=0.329,  *p corr*>0.999 | None |
|  |  |  |  |  |  |  |  |
| Theta  (4-8 Hz) | 0.844 ±0.202 | 0.826 ±0.202 | 0.798 ±0.201 | 0.799 ±0.204 | *F*=12.30, *p*<0.001,  ***p corr*<0.001** | *F*=1.04,  *p*=0.373,  *p corr*>0.999 | None |
|  |  |  |  |  |  |  |  |
| Alpha  (8-12 Hz) | 0.569 ±0.229 | 0.554 ±0.231 | 0.522 ±0.229 | 0.528 ±0.219 | *F*=9.60, *p*<0.001,  ***p corr*<0.001** | *F*=2.19,  *p*=0.087,  *p corr*=0.435 | None |
|  |  |  |  |  |  |  |  |
| Sigma  (12-15 Hz) | 0.268 ±0.215 | 0.252 ±0.213 | 0.223 ±0.216 | 0.236 ±0.210 | *F*=8.96, *p*<0.001,  ***p corr*<0.001** | *F*=6.06,  *p*<0.001,  ***p corr<*0.001** | **non vs. mild, non vs. sev.,**  **mod. vs. sev.** |
| Beta  (15-20 Hz) | –0.190 ±0.183 | –0.177 ±0.185 | –0.177 ±0.188 | –0.140 ±0.192 | *F*=9.73, *p*<0.001,  ***p corr*<0.001** | *F*=29.00, *p*<0.001,  ***p corr*<0.001** | **non vs. mild,**  **non vs. mod.,**  **non vs. sev.,**  **mild vs. sev.,**  **mod. vs. sev.** |

**Notes**: The subjects were reassigned to new groups from Table 1 after excluding the hypopnea events with arousal to adjust for cortical responses of respiratory events. Hypopnea was characterized by a reduction in peak signal excursions by ≥ 30% of the pre-event baseline using nasal pressure and ≥ 3% decrease in oxygen saturation.

Data are presented as mean ± SD; **a**log-transformed spectral power density (log10 μV2); bANCOVA controlling for age, sex, current smoking status, usual alcohol intake per day, recent use of TCA, non-TCA, and benzodiazepine, and the presence of insomnia; *p corr*, *p*-value after Bonferroni correction (uncorrected *p*-value × 5) for correction of multiple comparisons. The number in bold indicates significance after Bonferroni correction (*p* < 0.05). *c*The posthoc analysis was performed using Bonferroni correction.

**Abbreviations**: EEG, electroencephalography; OSA, obstructive sleep apnea; mod., moderate; sev., severe; ANOVA, analysis of variance; ANCOVA, analysis of covariance.

**Table S2.** Comparison of the absolute spectral power densitiesa of the groups during NREM and REM sleep after adjusting for cortical responses of respiratory events and potential confounding factors

| *Spectral bands* | *Non-OSA (n=1381)* | *Mild OSA (n=1599)* | *Mod. OSA (n=951)* | *Sev. OSA (n=562)* | *ANOVA* | *ANCOVA*b | |
| --- | --- | --- | --- | --- | --- | --- | --- |
| *Statistics* | *Statistics* | *Significant difference after post hoc analysisc* |
| Delta  (1-4 Hz) during NREM | 1.529 ±0.189 | 1.496 ±0.189 | 1.461 ±0.187 | 1.433 ±0.197 | *F*=44.26, *p*<0.001,  ***p corr*<0.001** | *F*=2.92, *p*=0.033,  *p corr*=0.330 | None |
|  |  |  |  |  |  |  |  |
| Delta  (1-4 Hz) during REM | 1.033 ±0.176 | 1.017 ±0.168 | 0.999 ±0.167 | 1.000 ±0.171 | *F*=9.00, *p*<0.001,  ***p corr*<0.001** | *F*=0.82, *p*=0.485,  *p corr*>0.999 | None |
|  |  |  |  |  |  |  |  |
| Theta  (4-8 Hz) during NREM | 0.885 ±0.202 | 0.866 ±0.202 | 0.835 ±0.202 | 0.831 ±0.203 | *F*=16.16, *p*<0.001,  ***p corr*<0.001** | *F*=0.89, *p*=0.447,  *p corr*>0.999 | None |
|  |  |  |  |  |  |  |  |
| Theta  (4-8 Hz) during REM | 0.609 ±0.213 | 0.601 ±0.205 | 0.582 ±0.205 | 0.590 ±0.211 | *F*=3.49, *p=*0.015,  *p corr*=0.150 | *F*=1.34, *p*=0.260,  *p corr*>0.999 | None |
|  |  |  |  |  |  |  |  |
| Alpha  (8-12 Hz) during NREM | 0.608 ±0.231 | 0.591 ±0.232 | 0.555 ±0.231 | 0.556 ±0.221 | *F*=13.12, *p*<0.001,  ***p corr*<0.001** | *F*=1.85, *p*=0.136,  *p corr*>0.999 | None |
|  |  |  |  |  |  |  |  |
| Alpha  (8-12 Hz) during REM | 0.334 ±0.240 | 0.340 ±0.238 | 0.323 ±0.234 | 0.345 ±0.231 | *F*=1.41, *p*=0.238,  *p corr*>0.999 | *F*=3.65, *p*=0.012,  *p corr*=0.120 | None |
|  |  |  |  |  |  |  |  |
| Sigma  (12-15 Hz) during NREM | 0.307 ±0.221 | 0.286 ±0.217 | 0.254 ±0.221 | 0.263 ±0.214 | *F*=12.67, *p*<0.001,  ***p corr*<0.001** | *F*=5.24, *p*=0.001,  ***p corr*=0.010** | **non vs. mild, non vs. sev.** |
|  |  |  |  |  |  |  |  |
| Sigma  (12-15 Hz) during REM | 0.029 ±0.220 | 0.046 ±0.219 | 0.036 ±0.215 | 0.061 ±0.214 | *F*=3.34, *p*=0.019,  *p corr*=0.190 | *F*=7.92, *p*<0.001,  ***p corr*<0.001** | **non vs. mild,**  **non vs. mod.,**  **non vs. sev.,**  **mild vs. sev.,**  **mod. vs. sev.** |
|  |  |  |  |  |  |  |  |
| Beta  (15-20 Hz) during NREM | –0.194 ±0.179 | –0.182 ±0.181 | –0.180 ±0.186 | –0.137 ±0.190 | *F*=12.91, *p*<0.001,  ***p corr*<0.001** | *F*=35.50, *p*<0.001,  ***p corr*<0.001** | **non vs. mild,**  **non vs. mod.,**  **non vs. sev.,**  **mild vs. sev.,**  **mod. vs. sev.** |
|  |  |  |  |  |  |  |  |
| Beta  (15-20 Hz) during REM | –0.198 ±0.216 | –0.179 ±0.221 | –0.185 ±0.213 | –0.168 ±0.217 | *F*=3.22, *p*=0.022,  *p corr*=0.220 | *F*=10.92, *p*<0.001,  ***p corr*<0.001** | **non vs. mild,**  **non vs. mod.,**  **non vs. sev.,**  **mild vs. sev.** |

**Notes**: The subjects were reassigned to new groups from Table 1 after excluding the hypopnea events with arousal to adjust for cortical responses of respiratory events. Hypopnea was characterized by a reduction in peak signal excursions by ≥ 30% of the pre-event baseline using nasal pressure and ≥ 3% decrease in oxygen saturation.

Data are presented as mean ± SD; **a**log-transformed spectral power density (log10 μV2); bANCOVA controlling for age, sex, current smoking status, usual alcohol intake per day, recent use of TCA, non-TCA, and benzodiazepine, and the presence of insomnia; *p corr*, *p*-value after Bonferroni correction (uncorrected *p*-value × 10) for correction of multiple comparisons. The number in bold indicates significance after Bonferroni correction (*p* < 0.05). *c*The posthoc analysis was performed using Bonferroni correction.

**Abbreviations**: EEG, electroencephalography; OSA, obstructive sleep apnea; mod., moderate; sev., severe; ANOVA, analysis of variance; ANCOVA, analysis of covariance; NREM, non-rapid eye movement sleep; REM, rapid eye movement sleep.
